# Supplementary material
Source: bioRxiv or medRxiv preprint supplement (https://www.biorxiv.org/highwire/filestream/42870/field_highwire_adjunct_files/0/144345-1.pdf)
Supplement: Supplementary file [file 144345-1.pdf]

## **SUPPLEMENTAL INFORMATION**

### **Molecular basis for the specific and multivariate recognitions of RNA substrates by human hnRNPA2/B1**

**Baixing Wu<sup>1,4</sup>, Shichen Su<sup>1,4</sup>, Deepak P. Patil<sup>2</sup>, Hehua Liu<sup>1,3</sup>, Jianhua Gan<sup>3</sup>, Samie R. Jaffrey<sup>2</sup> & Jinbiao Ma<sup>1,5\*</sup>**

#### **SUPPLEMENTAL FIGURE LEGENDS**



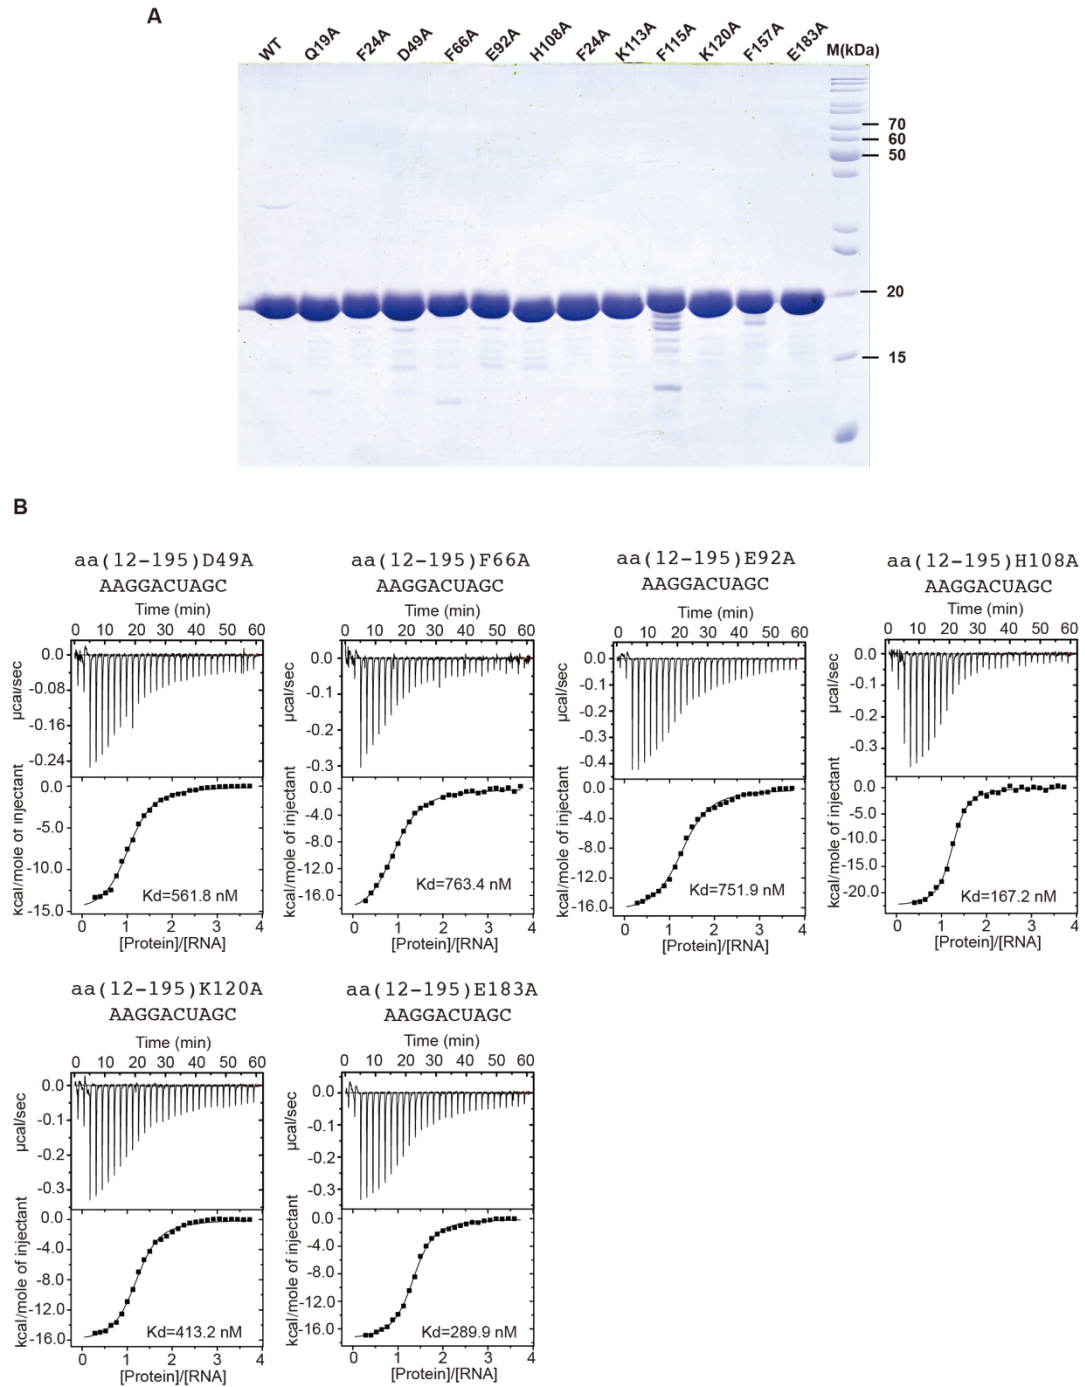

**Figure S2 Mutagenesis study of RRMs by ITC experiments (related to Figure 3)**

(A) SDS-PAGE of wildtype and protein mutants.

(B) ITC results of hnRNP A2/B1 mutants with 10mer RNA.

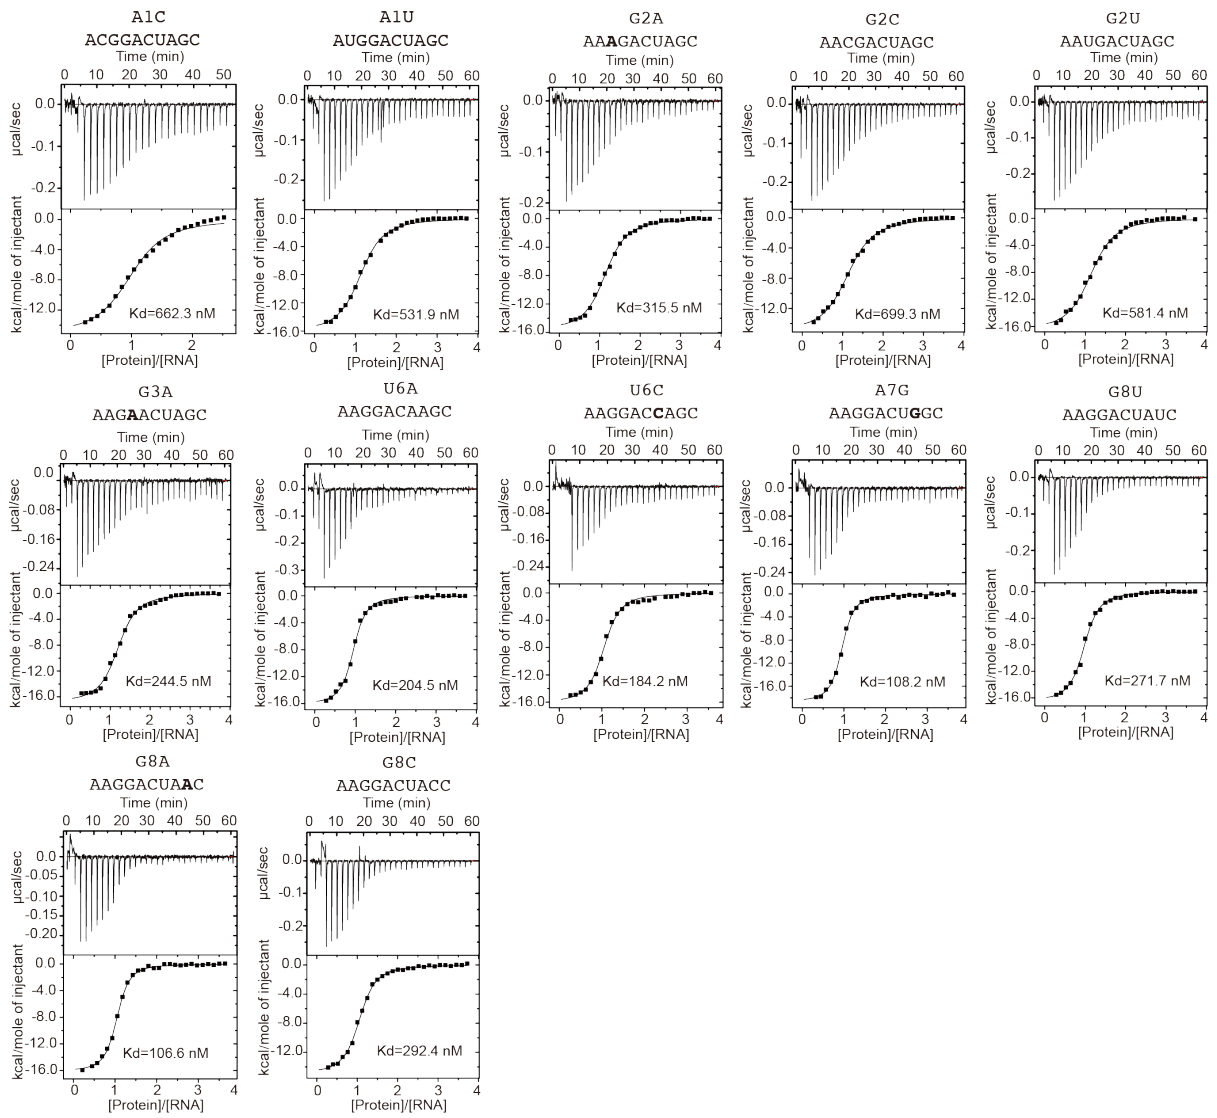

Figure S3 Mutagenesis study of RNA by ITC experiments (related to Figure 3).



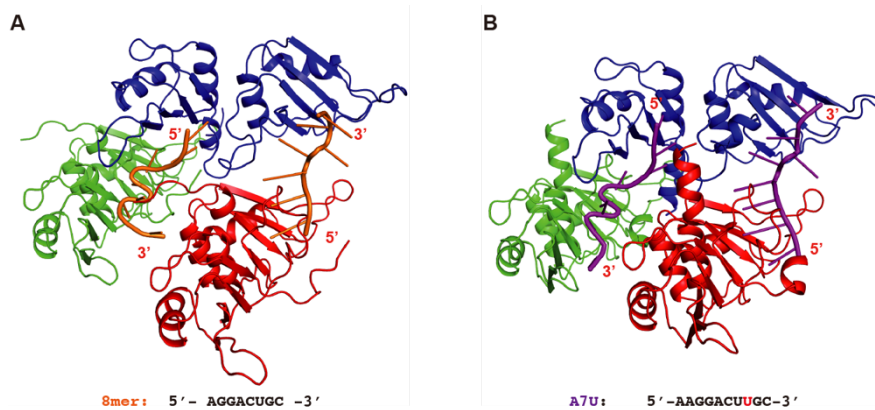

**Figure S5 Crystal packing interactions (related to Figure 5).**

(A) Crystal packing interactions in 8mer.

(B) Crystal packing interactions in A7U complex.

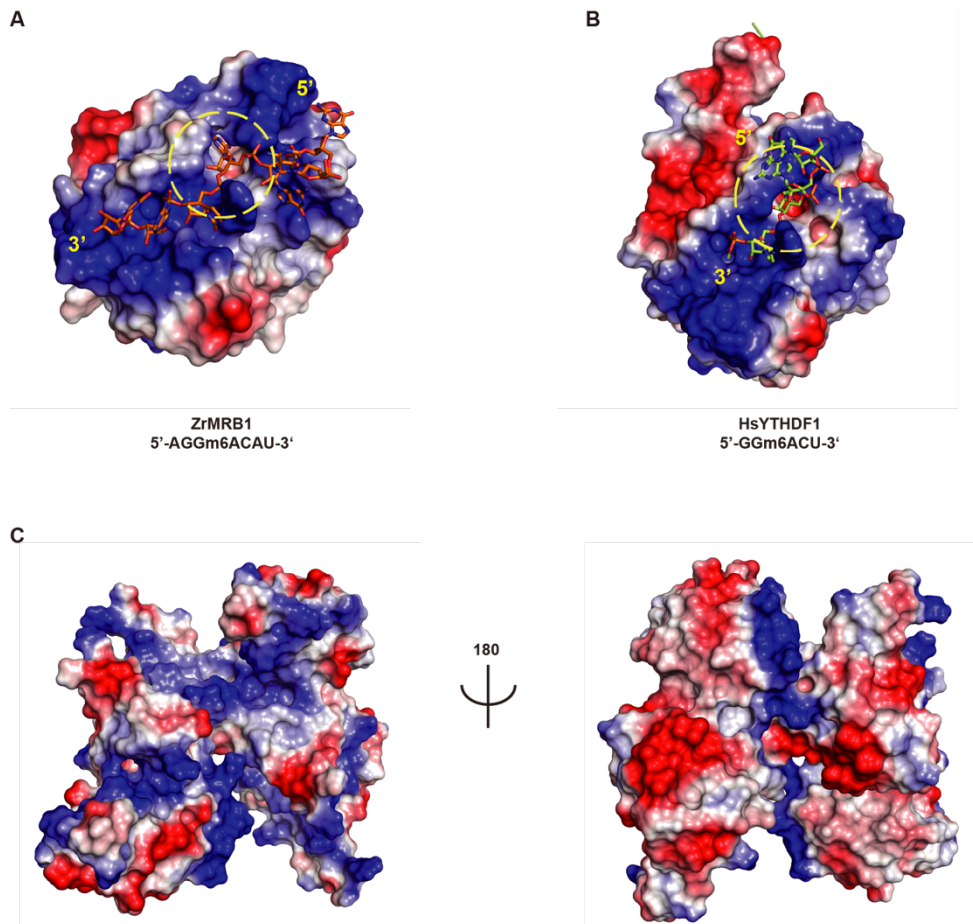

**Figure S6 Surface charge comparison of ZrMRB1, HsYTHDF1 and hnRNP A2/B1 (related to Figure 6).**

(A) Surface representation of ZrMRB1 in complex with RNA containing m<sup>6</sup>A modification.

(B) HsYTHDF1 in complex with RNA containing m<sup>6</sup>A modification, RNA are all shown by stick.

(C) Surface representation of hnRNP A2/B1 RRMs in complex with 10mer RNA.

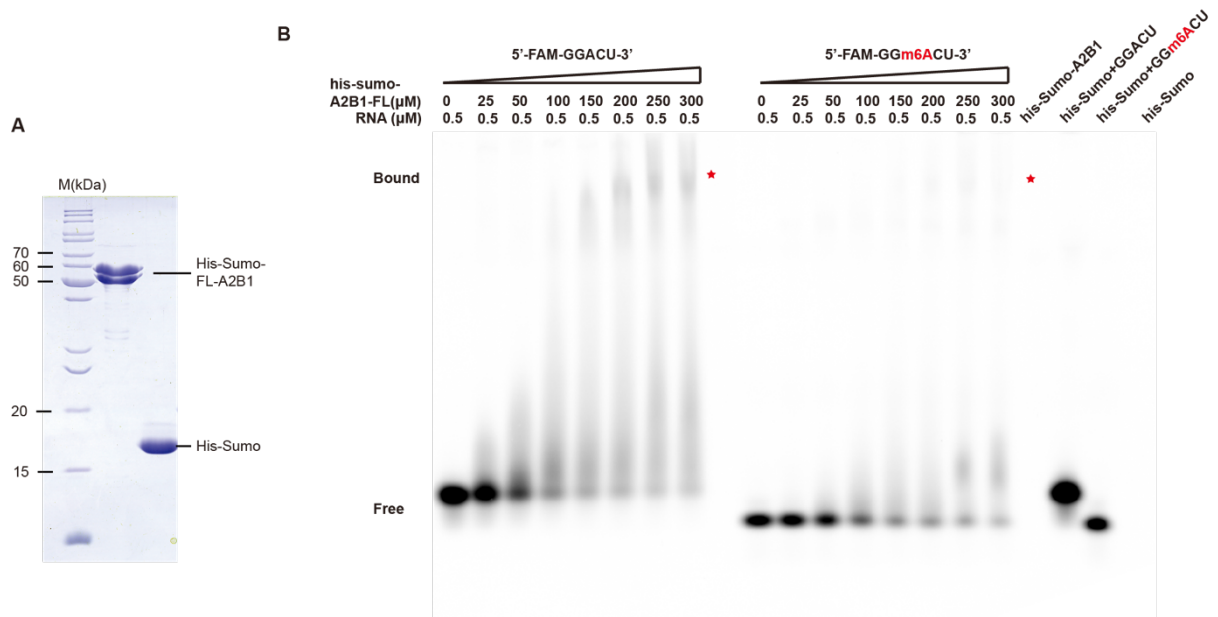

**Figure S7 EMSA experiment (related to Figure 6).**

(A) SDS-PAGE of full-length hnRNPA2/B1 with His-sumo tag.

(B) EMSA result of full-length hnRNPA2/B1 and 5'-FAM-labeled RNA substrates with or without m<sup>6</sup>A modification.
